# Supplementary material for: Erythropoietin attenuates cardiac dysfunction in experimental sepsis in mice via activation of the β-common receptor
Source: PubMed Central journal article supplement — Dis Model Mech. 2013 Mar 15;6(4):1021–30. doi: 10.1242/dmm.011908 (PMC3701221; doi:10.1242/dmm.011908), 2013-03-15
Supplement: supp_011908_DMM011908.pdf [file supp_011908_DMM011908.pdf]

**Figure S1**

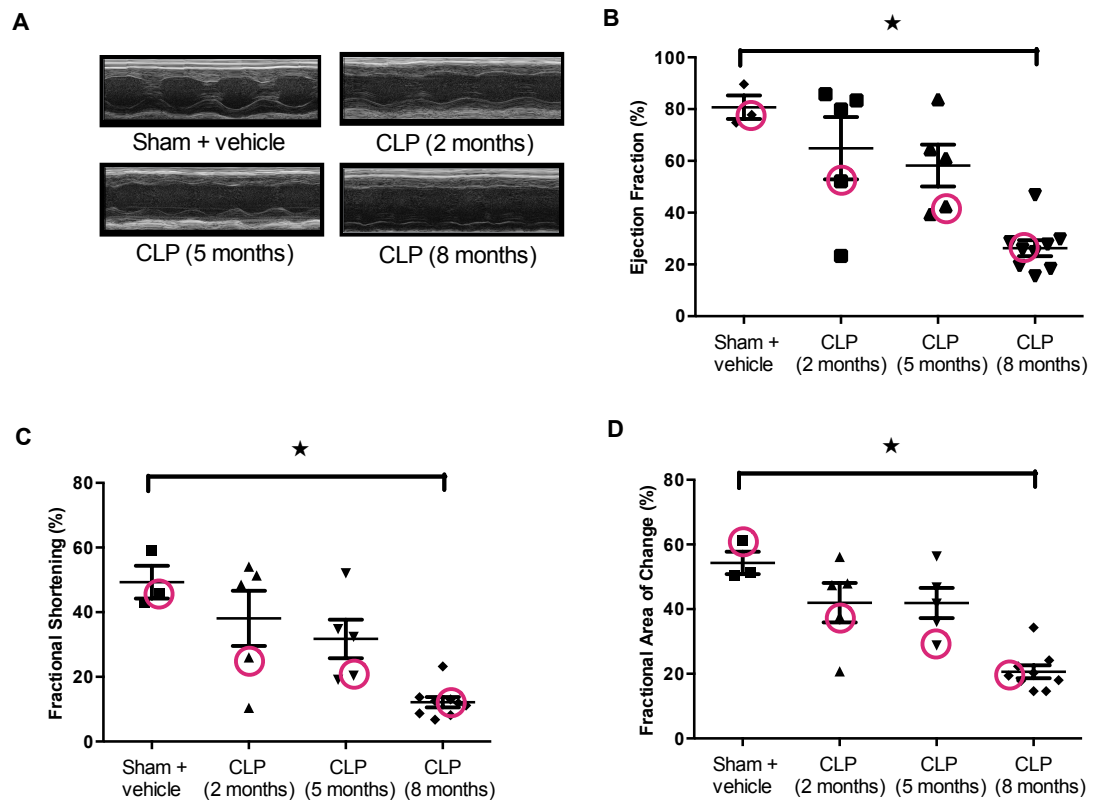

**Figure S1: The development of cardiac dysfunction in aging wild-type mice following cecal ligation and puncture (CLP).** (A) Representative M-mode echocardiograms, percentage (B) ejection fraction, (C) fractional shortening and (D) fractional area of change 24 h subsequent to CLP surgery. Sham + vehicle, (n = 3), CLP 2 months (n = 5); CLP 5 months (n = 5); CLP 8 months (n = 9). Red circles indicate animals used for representative M-mode images seen in (A). Data are expressed as means  $\pm$  SEM. for n number of observations. ★ P < 0.05.
